# Supplementary material for: Serum from patients with SLE instructs monocytes to promote IgG and IgA plasmablast differentiation
Source: PubMed Central journal article supplement — J Exp Med. 2012 Jul 2;209(7):1335–48. doi: 10.1084/jem.20111644 (PMC3405503; doi:10.1084/jem.20111644), 2012-07-02
Supplement: supp_jem.20111644_JEM_20111644_sm.pdf [file supp_jem.20111644_JEM_20111644_sm.pdf]

SUPPLEMENTAL MATERIAL

Joo et al., <http://www.jem.org/cgi/content/full/jem.20111644/DC1>

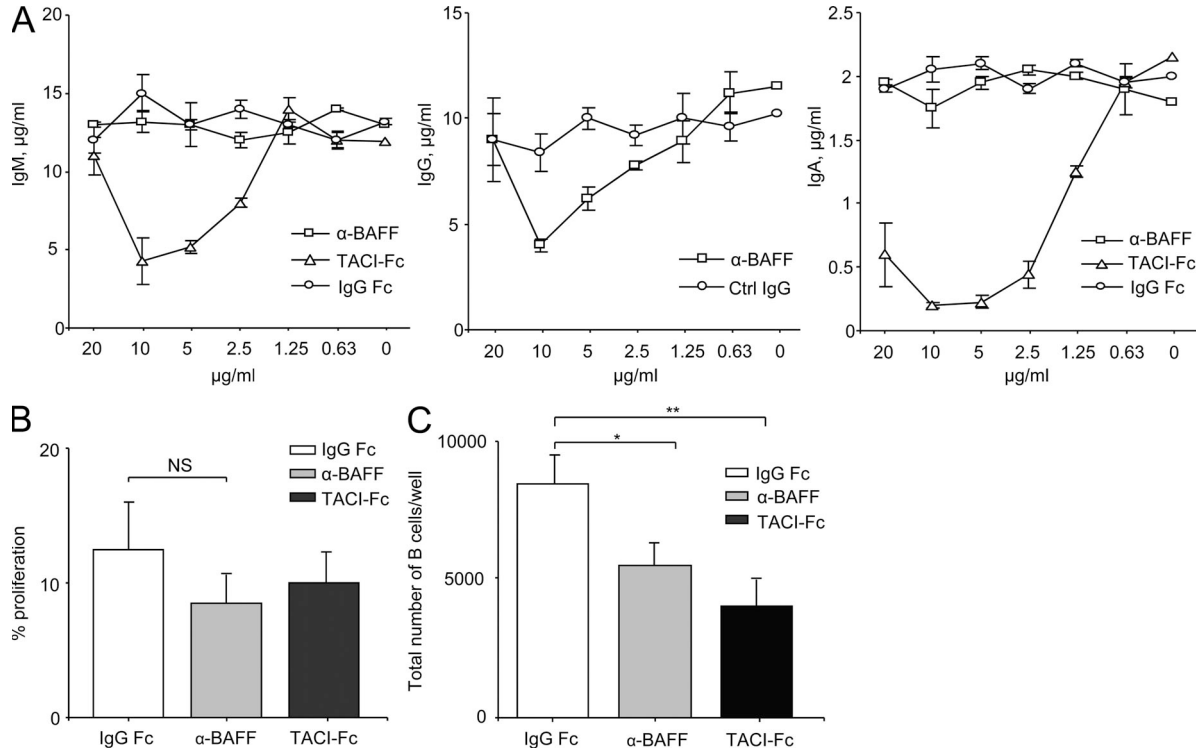

**Figure S1. TACI-Fc and anti-BAFF antibody decrease IgM and IgA as well as IgG responses in dose-dependent manners.** (A) CFSE-labeled purified naive B cells were co-cultured with SLE-DCs for 12 d in the presence of the indicated antibodies or recombinant proteins. Total Ig levels in the supernatants were assessed by ELISA. Representative data from one experiment with triplicate assay are shown. Experiments using sera from four SLE patients and cells from four healthy donors showed similar results. (B) Proliferation. (C) Total numbers of B cells on day 6. In B and C, combined data from experiments using sera from four SLE patients and cells from four healthy donors are presented. In all experiments, 20 U/ml IL-2 and 50 nM CpG were added to the culture. Mean ± SD is shown. Student's *t* test: \*, *P* < 0.05; \*\*, *P* < 0.01.

**Table S1. Demographics of SLE patients and healthy donors tested in this study**

| Donors  | Gender |        | Ethnicity |    |    |    |    | Age (mean)<br><i>yr</i> | SLEDAI (mean) |
|---------|--------|--------|-----------|----|----|----|----|-------------------------|---------------|
|         | Male   | Female | C         | AS | AA | H  | NR |                         |               |
| SLE     | 18     | 78     | 11        | 10 | 26 | 45 | 4  | 14.42                   | 6.24 (0–22)   |
| Healthy | 21     | 26     | 19        | 4  | 5  | 8  | 11 | 16.9                    | NA            |

AA, African American; AS, Asian; C, Caucasian (not of Hispanic decent); H, Hispanic; NA, not applicable; NR, not reported/recorded.
